# Supplementary material for: Cell shape and the microenvironment regulate nuclear translocation of NF-κB in breast epithelial and tumor cells
Source: PubMed Central journal article supplement (PMC4380925; doi:10.15252/msb.20145644), 2015-03-03

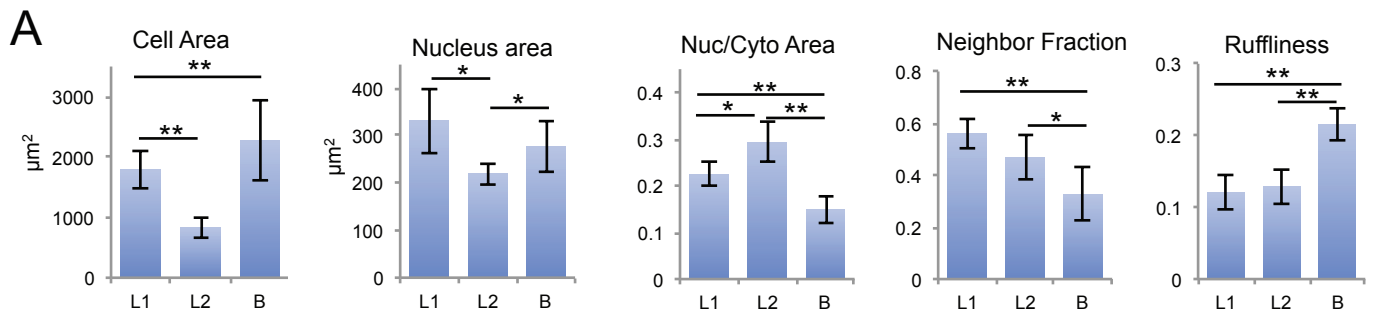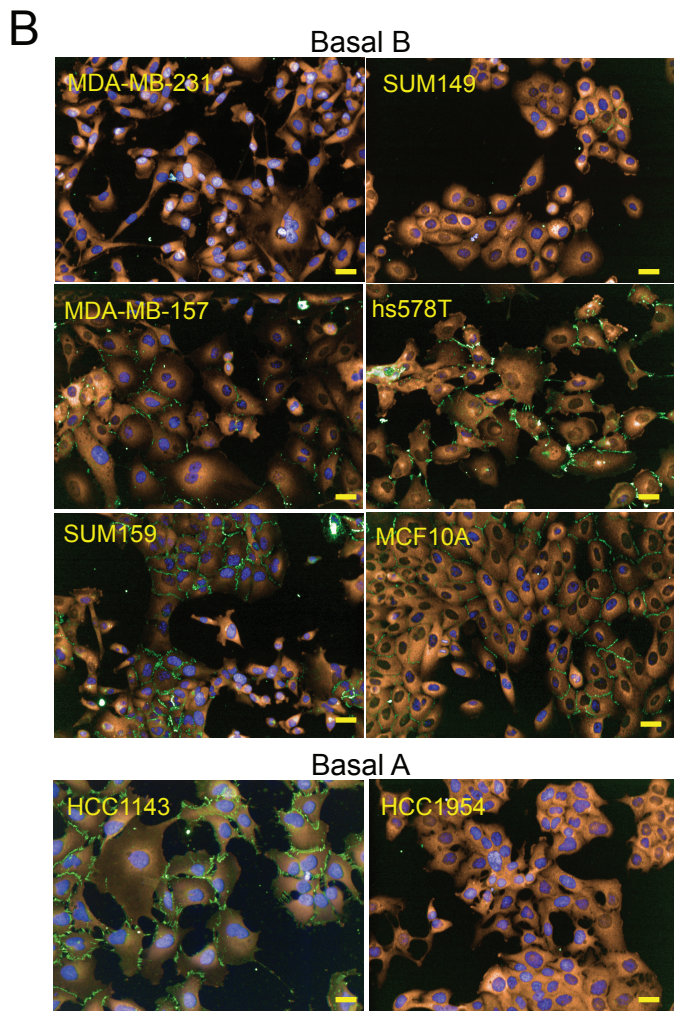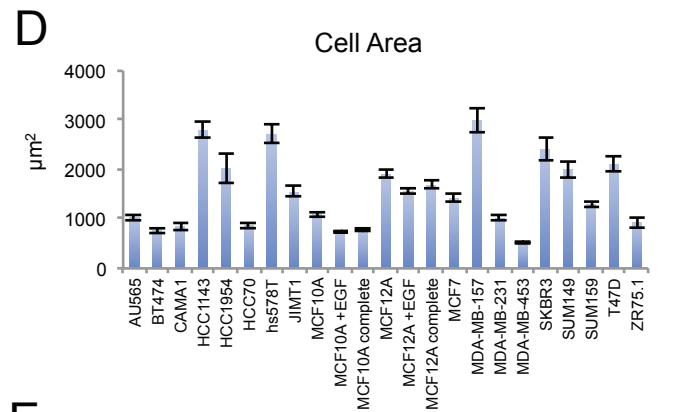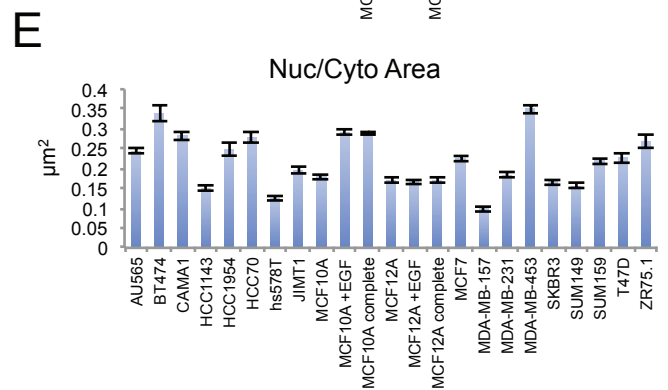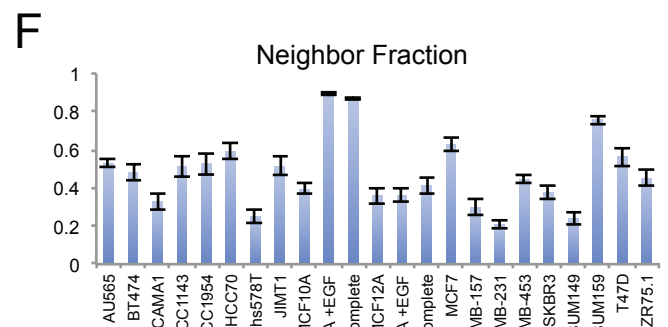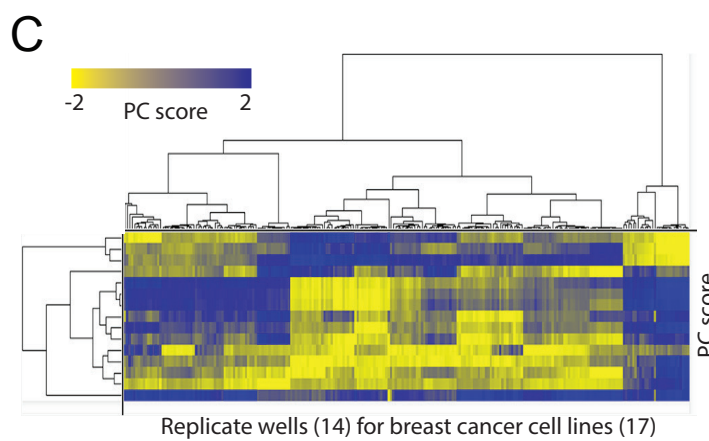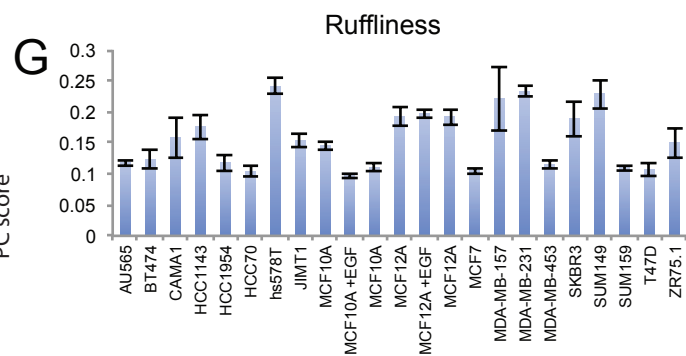

Supplement: msb0011-0790-sd1.pdf [file msb0011-0790-sd1.pdf]
