# Supplementary material for: Cell shape and the microenvironment regulate nuclear translocation of NF-κB in breast epithelial and tumor cells
Source: PubMed Central journal article supplement (PMC4380925; doi:10.15252/msb.20145644), 2015-03-03

**A**

NF- $\kappa$ B localization

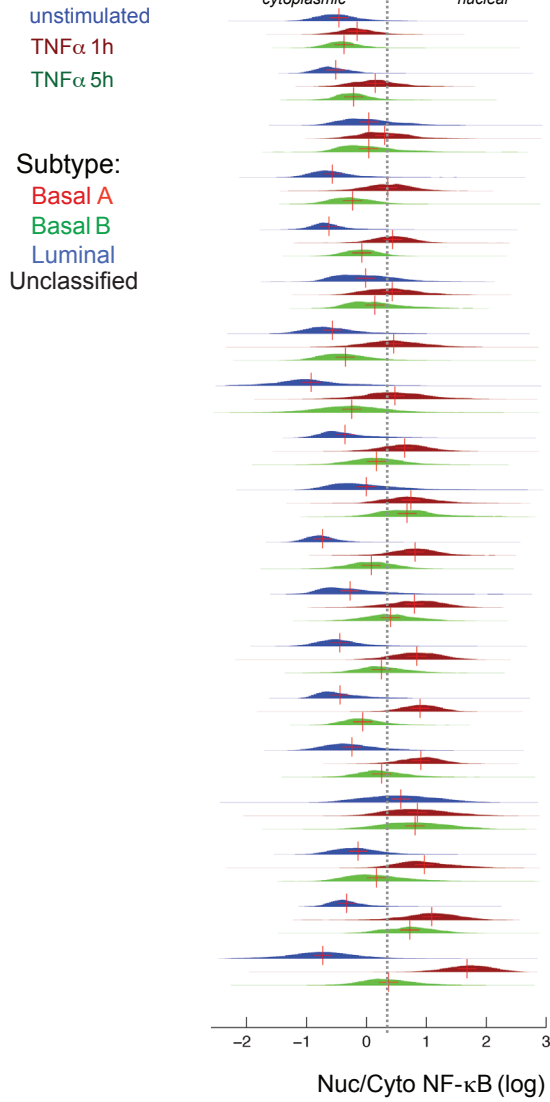

**B**

Cell shape

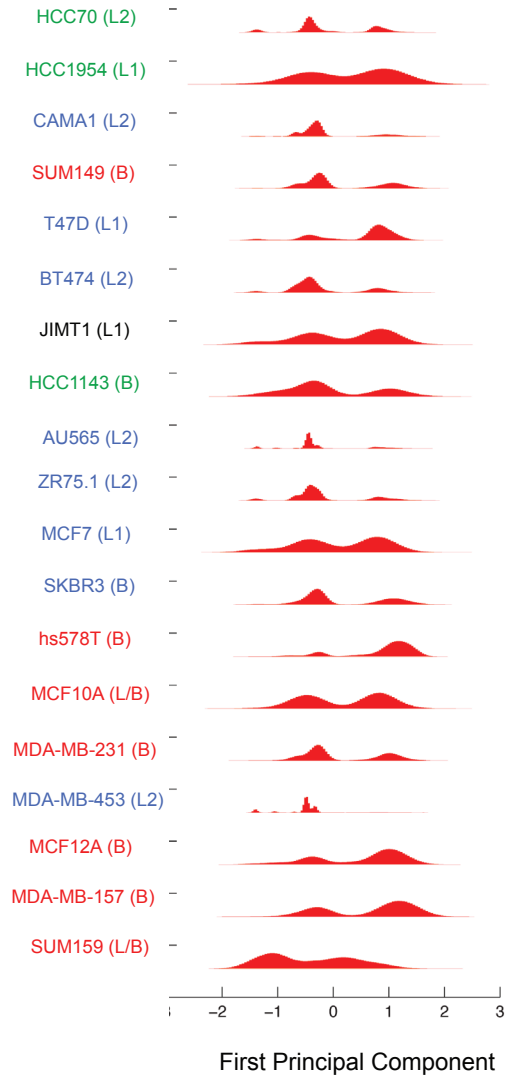

**C**

Associations between NF- $\kappa$ B ratio and shape features

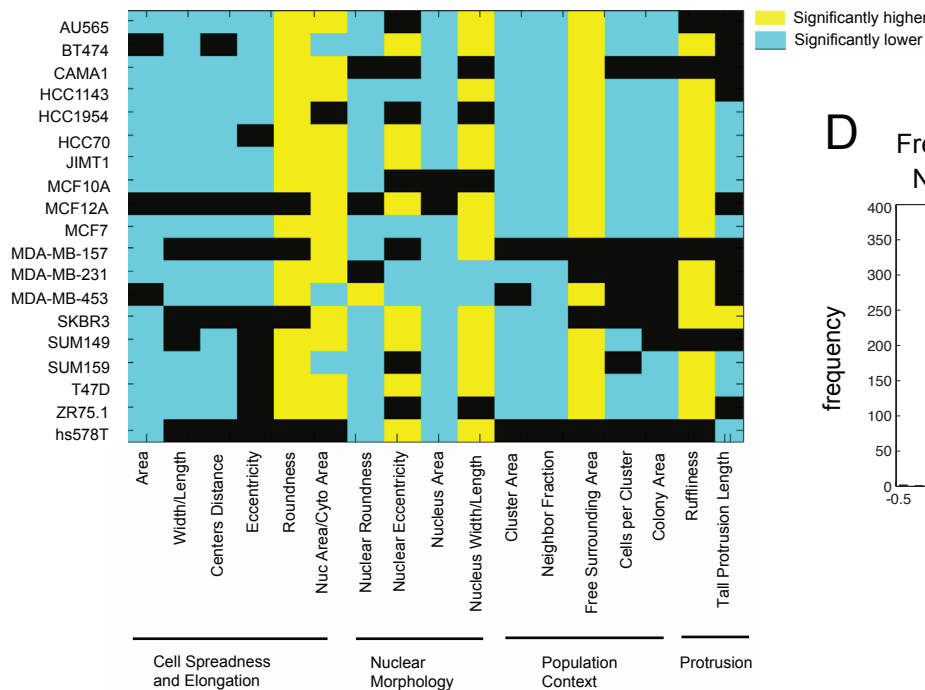

**D**

Frequency of correlations between NF- $\kappa$ B ratio and shape features

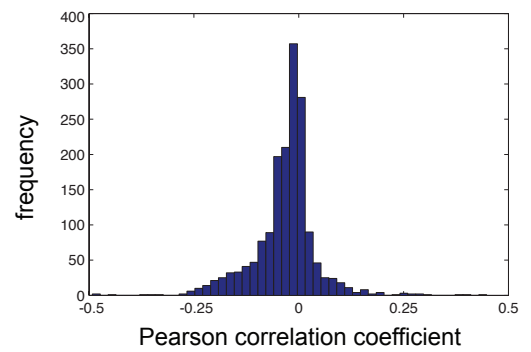

Supplement: msb0011-0790-sd2.pdf [file msb0011-0790-sd2.pdf]
