# Supplementary material for: Cell shape and the microenvironment regulate nuclear translocation of NF-κB in breast epithelial and tumor cells
Source: PubMed Central journal article supplement (PMC4380925; doi:10.15252/msb.20145644), 2015-03-03

**A**

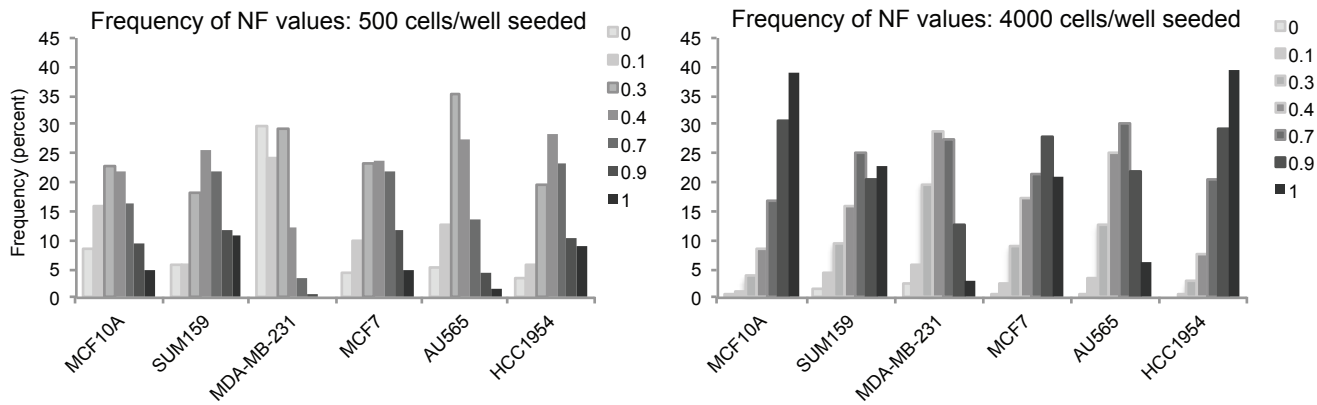

**B**

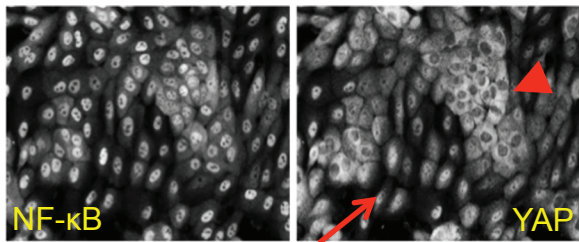

**C**

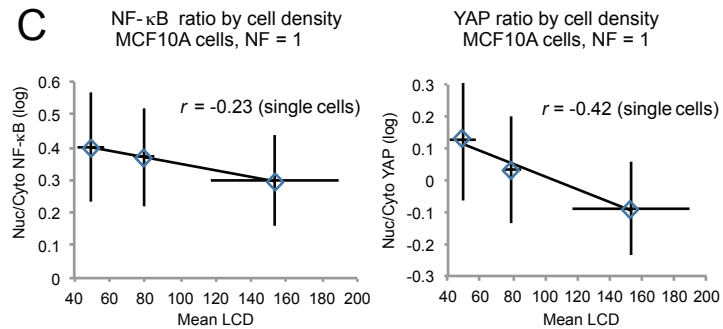

**D**

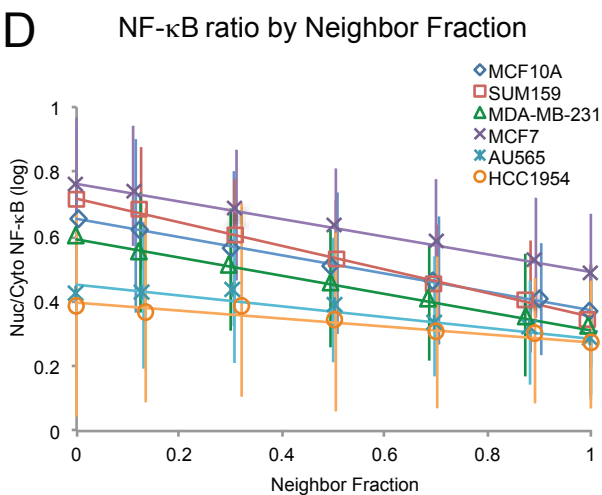

**E**

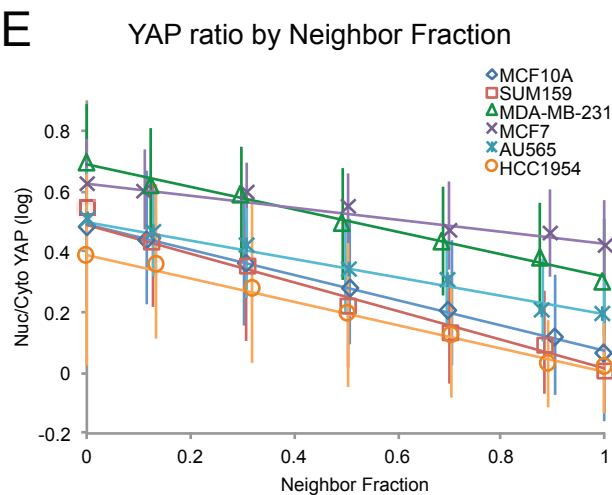

**F**

Correlations between NF and TF ratio in single cells

|            | NF-κB corr. (r) | YAP corr. (r) | cells (n) |
|------------|-----------------|---------------|-----------|
| MCF10A     | -0.358          | -0.467        | 19489     |
| SUM159     | -0.454          | -0.547        | 6005      |
| MDA-MB-231 | -0.303          | -0.382        | 10379     |
| MCF7       | -0.345          | -0.353        | 9170      |
| AU565      | -0.130          | -0.399        | 7806      |
| HCC1954    | -0.206          | -0.367        | 5684      |

**G**

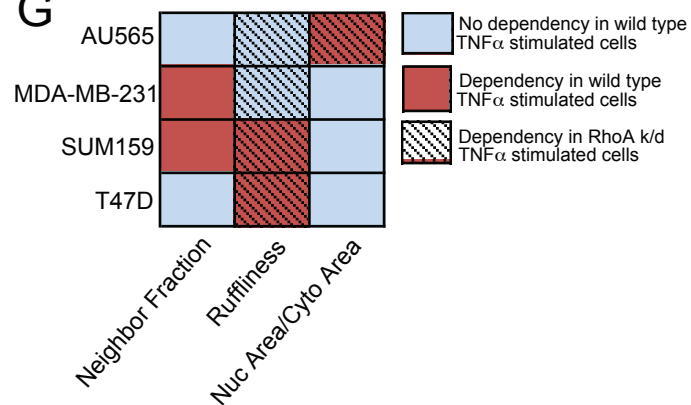

Supplement: msb0011-0790-sd5.pdf [file msb0011-0790-sd5.pdf]
