# Supplementary material for: Cell shape and the microenvironment regulate nuclear translocation of NF-κB in breast epithelial and tumor cells
Source: PubMed Central journal article supplement (PMC4380925; doi:10.15252/msb.20145644), 2015-03-03

**A** PA gels: Cell Area

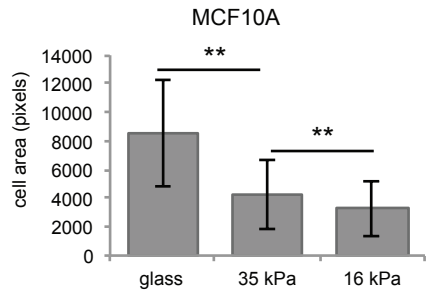

**B** PA gels: Nucleus Area

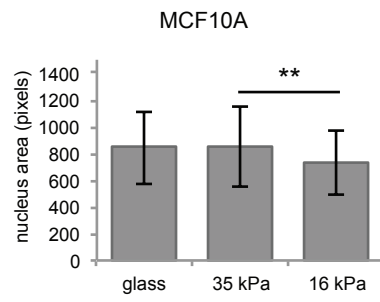

**C** PA gels: Cell Area

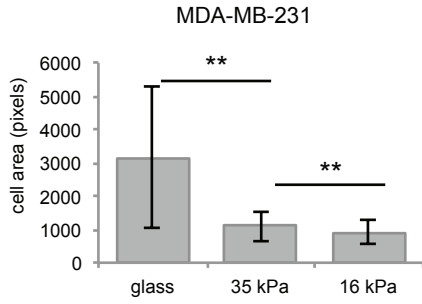

**D** PA gels: Nucleus Area

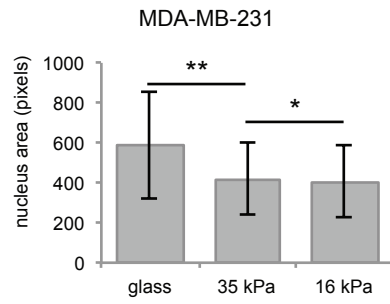

Supplement: msb0011-0790-sd6.pdf [file msb0011-0790-sd6.pdf]
